1 **Title:**

2 **Loss of Rnf31 and Vps4b sensitizes pancreatic cancer to T cell-mediated killing**

3

4 **Authors:**

5 Nina Frey<sup>1,2</sup>, Luigi Tortola<sup>1</sup>, David Egli<sup>1</sup>, Sharan Janjuha<sup>2</sup>, Kim Fabiano Marquart<sup>1,2</sup>, Tanja  
6 Rothgangel<sup>2</sup>, Franziska Ampenberger<sup>1</sup>, Manfred Kopf<sup>1</sup> and Gerald Schwank<sup>1,2\*</sup>

7

8 **Affiliations:**

9 <sup>1</sup> Institute of Molecular Health Sciences, ETH Zurich, Zurich, Switzerland

10 <sup>2</sup> Department of Pharmacology and Toxicology, University of Zurich, Zurich, Switzerland

11 \*Corresponding author: gerald.schwank@uzh.ch

12

13 **Abstract:**

14 Pancreatic ductal adenocarcinoma (PDA) is an inherently immune cell deprived tumor,  
15 characterized by desmoplastic stroma and suppressive immune cells. Here we systematically  
16 dissected PDA intrinsic mechanisms of immune evasion by *in vitro* and *in vivo* CRISPR  
17 screening, and identified Rnf31 and Vps4b as essential factors required for escaping CD8<sup>+</sup> T  
18 cell-killing. Using murine PDA cells and human PDA organoids, we demonstrate that *Rnf31*  
19 protects from TNF-mediated caspase 8 cleavage and subsequent apoptosis induction. For  
20 *Vps4b* we found that inactivation impairs autophagy, resulting in increased accumulation of  
21 CD8<sup>+</sup> T cell-derived granzyme B and subsequent tumor cell lysis. Orthotopic transplantation  
22 of Rnf31- or Vps4b deficient pancreatic tumors, moreover, revealed increased CD8<sup>+</sup> T cell  
23 infiltration and effector function, and markedly reduced tumor growth in mice. Our work  
24 uncovers vulnerabilities in PDA that might be exploited to render these tumors more  
25 susceptible to the immune system.

26

27

## 28 **Introduction:**

29 Immune evasion is a common trait of most human cancers. Through phenotypic changes tumor  
30 cells evade recognition of effector T cells and modulate the tumor microenvironment to  
31 establish an immune suppressive niche <sup>1,2</sup>. While immune checkpoint inhibition shows great  
32 potential for curative cancer treatment, pancreatic ductal adenocarcinoma (PDA) is largely  
33 refractory to immunotherapy <sup>3,4</sup>. Among the described mechanisms responsible for the highly  
34 effective immune evasion of PDA are (i) insufficient antigenicity <sup>5</sup>, (ii) high expression of PD-  
35 L1 <sup>6</sup>, (iii) exclusion of dendritic cells while attracting T regulatory cells <sup>2</sup> and suppressive  
36 myeloid populations <sup>7,8</sup>, and (iv) the sequestration of major histocompatibility complex class I  
37 (MHC-I) <sup>9</sup>. In order to better understand cell-autonomous mechanisms that protect tumors from  
38 immune clearance, genome-wide CRISPR-Cas9 screens have been performed in melanoma,  
39 renal-, colorectal- and breast cancer cell lines. Together they identified the interferon- $\gamma$  (IFN $\gamma$ )  
40 response, TNF-mediated NF $\kappa$ B signaling and autophagy as core pathways involved in immune  
41 evasion across different cancer types <sup>10-18</sup>. However, to our knowledge, a comprehensive  
42 genetic analysis of potential target genes to enhance anti-tumor immunity in PDA is still  
43 missing.

44 Here we used genome-wide *in vitro* CRISPR screening and targeted *in vivo* CRISPR screening  
45 to systematically reveal positive and negative regulators of cytotoxic T lymphocyte (CTL)  
46 sensitivity in PDA. In addition to previously described genes involved in the regulation CTL-  
47 mediated tumor cell killing, we identify *Rnf31* and *Vps4b* as central components for PDA  
48 immune escape *in vitro* and *in vivo*. Our results suggest that *Rnf31*, as part of the linear  
49 ubiquitination chain assembly complex (LUBAC), mediates immune-escape by stabilizing  
50 anti-apoptotic proteins in the TNF pathway, and that *Vps4b*, as part of the autophagy  
51 machinery, reduces susceptibility to T-cell mediated tumor cell lysis by lowering intracellular  
52 granzyme B contents. The elucidated mechanisms of immune evasion in PDA provide potential  
53 strategies for enhancing efficacy of cancer immunotherapies.

54

## 55 **Results:**

### 56 **A genome-wide CRISPR screen identifies regulators of immune evasion in PDA**

57 To identify genes modulating CTL-mediated killing of PDA we performed a pooled, genome-  
58 wide CRISPR knock-out screen in pancreatic cancer cells. We first engineered a PDA cell line  
59 derived from the autochthonous KPC mouse model (*Kras*<sup>G12D</sup>, *Trp53*<sup>R172H/+</sup>, *Pdx-Cre*), which  
60 stably expresses *SpCas9* and chicken ovalbumin (OVA). Cells were subsequently transduced

61 with a murine single-guide (sg)RNA library targeting 19 647 genes at a 500x coverage<sup>19</sup>. To  
62 mimic cytotoxic T cell killing, we co-cultured cancer cells for three days with activated, OVA-  
63 specific CD8<sup>+</sup> T cells (OT-I T cells), followed by a three-day recovery period prior to DNA  
64 isolation for analysis by next generation sequencing (NGS) from the surviving cell population  
65 [Fig. 1a]. Validating screening conditions and sufficient library representation, we observed a  
66 strong overlap of depleted sgRNAs targeting essential genes in OT-I T cell treated- and  
67 untreated KPC cells [Supplementary Figs. 1a, b]. Next, we inspected differentially distributed  
68 sgRNAs, and defined genes targeted by enriched sgRNAs as resistors and genes targeted by  
69 depleted sgRNAs as sensitizers for CTL-mediated killing (FDR < 0.1). We identified several  
70 genes with a well-characterized role in CTL-mediated killing in different cancer types,  
71 demonstrating that the previously described core cancer intrinsic CTL evasion gene network is  
72 also conserved in PDA [Figs. 1b, c]<sup>10–12,14,20</sup>. For example, genes associated with the IFN $\gamma$   
73 pathway (*Jak1*, *Jak2*, *Ifngr1*, *Ifngr2*, *Stat1*) and antigen presentation machinery (*B2m*, *Tap1*)  
74 conferred resistance to CTL-mediated PDA killing upon inactivation [Figs. 1c, d,  
75 Supplementary Fig. 1c], and genes regulating TNF-triggered apoptosis (*Cflar*, *Traf2*), NF $\kappa$ B  
76 signaling (*Nfkbia*, *Tnfaip3*) and autophagy (*Atg5*, *Atg7*, *Atg10*, *Atg12*, *Gabarapl2*) sensitized  
77 PDA cells to CTL-mediated killing upon inactivation [Figs. 1c, d, Supplementary Fig. 1c].  
78 Interestingly, the two strongest sensitizers to T cell-mediated killing identified in our PDA  
79 screen were *Rnf31* and *Vps4b*, but for both genes mechanistic insights in context of CTL  
80 sensitivity are lacking.

81

## 82 **A targeted CRISPR screen validates immune modulators *in vivo***

83 To explore whether top candidates from the *in vitro* screen also affect CTL-mediated PDA  
84 killing *in vivo* we next performed a targeted library screen in mice. We generated a secondary  
85 library targeting 63 genes (hits with FDR < 0.1) with ten sgRNAs per gene, and containing 600  
86 non-targeting control sgRNAs as well as seven positive control sgRNAs targeting ovalbumin.  
87 We furthermore omitted several IFN $\gamma$  pathway components to avoid redundancy. The library  
88 was transduced into KPC-Cas9-OVA cells, which we subsequently orthotopically transplanted  
89 into pancreata of RAG1<sup>-/-</sup> mice. After tumor formation, we adoptively transferred activated  
90 CD8<sup>+</sup> OT-I T cells to tumor-bearing mice and collected the residual tumors five days later [Fig.  
91 2a]. *In vivo* validated candidates showed consistent phenotypes across all mice [Fig. 2b], and  
92 in line with previous studies we observed a substantial, albeit not complete overlap between *in*  
93 *vitro* and *in vivo* screening results [Fig. 2c, Supplementary Fig. 2a]<sup>21</sup>. Resistors of CTL evasion

94 included well-known immune evasion genes, such as *Stat1* and *Casp8*, as well as the positive  
95 control *ovalbumin* [Fig. 2b]. Among sensitizers of CTL killing - which are of particular  
96 therapeutic interest as they bear the potential to enhance anti-tumor immunity in PDA upon  
97 inhibition - were the previously described genes *Adar* and *Cflar*<sup>22-24</sup>, as well as the two  
98 strongest sensitizers identified in our CRISPR screen, *Vps4b* and *Rnf31* [Figs. 2b, d], prompting  
99 us to further study their role in PDA immune evasion.

100

### 101 **A competition assay confirms the role of *Rnf31* and *Vps4b* in immune evasion**

102 We then performed arrayed validation of *Vps4b*- and *Rnf31*-mediated PDA sensitization to  
103 CTL killing in a competition assay. KPC-Cas9-OVA cells carrying *Vps4b*- and *Rnf31*-  
104 targeting sgRNAs were labeled with mCherry<sup>+</sup>, and KPC-Cas9-OVA cells carrying a non-  
105 targeting control sgRNA were labeled with GFP<sup>+</sup>. After confirming that knock-outs do not  
106 affect cell proliferation per-se [Supplementary Fig. 3a], we co-cultured candidate lines with  
107 CD8<sup>+</sup> OT-I T cells and assessed mCherry and GFP proportions by flow cytometry [Fig. 3a].  
108 As expected, without generating a gene knock-out in mCherry<sup>+</sup> cells we did not observe a shift  
109 in the mCherry:GFP ratio after the addition of OT-I T cells [Figs. 3b, c], while targeting *Stat1*,  
110 a well-known resistor of CTL killing and positive control for our assay, shifted the ratio  
111 towards IFN $\gamma$ - signaling deficient mCherry<sup>+</sup> cells [Figs. 3b, c]. In contrast, *Vps4b*<sup>KO</sup> and  
112 *Rnf31*<sup>KO</sup> KPC cells had a strong growth disadvantage under immune attack, leading to an  
113 increase of the GFP<sup>+</sup> control cell population [Figs. 3b, c]. Our results therefore confirm that  
114 inhibition of *Rnf31* and *Vps4b* sensitizes PDA to CTL killing.

115

### 116 **Functional characterization of the role of *Rnf31* and *Vps4b* in immune evasion**

117 Antigen presentation by major histocompatibility complex I (MHC-I) proteins is necessary for  
118 efficient anti-tumor immunity. As shown in a recent study, pancreatic cancer cells commonly  
119 sequester MHC-I to evade the adaptive immune system<sup>9</sup>, prompting us to suspected that loss  
120 of *Rnf31* and *Vps4b* facilitates CD8<sup>+</sup> mediated killing by increasing MHC-I levels on PDA. To  
121 test this hypothesis, we assessed surface MHC-I levels in KPC cells upon exposure to CTLs.  
122 Confirming our assay, we observed robust induction of MHC-I upregulation in parental KPC  
123 cells, which, as expected, was perturbed in IFN $\gamma$  signaling deficient *Stat1*<sup>KO</sup> cells (Fig. 3d,  
124 Supplementary Fig. 3d). Next, we analyzed MHC-I induction in *Rnf31*<sup>KO</sup> and *Vps4b*<sup>KO</sup> KPC  
125 cells. However, we observed similar surface MHC-I levels compared to the parental cell line

126 (Fig. 3d), demonstrating that enhanced CTL-mediated killing is not triggered by an increase in  
127 antigen presentation [Fig. 3d].

128 Next, we sought to gain insights into the transcriptional networks mediating the sensitizing  
129 effects of *Rnf31*<sup>KO</sup> and *Vps4b*<sup>KO</sup> to CTL killing. We therefore performed RNA-sequencing  
130 (RNA-seq) on the different PDA knock-out lines with and without six hours of CD8<sup>+</sup> T cell  
131 exposure [Supplementary Fig. 3b]. Confirming functional gene knock-outs, transcript levels of  
132 *Rnf31* and *Vps4b* were downregulated in the respective PDA lines [Supplementary Fig. 3c].  
133 Furthermore, *Rnf31*<sup>KO</sup> and *Vps4b*<sup>KO</sup> cell lines displayed relatively mild, but consistent  
134 transcriptional changes [Fig. 3e]. Among the differentially expressed genes in CTL-treated  
135 *Rnf31* or *Vps4b* knock-out PDA cells were several cytokines and chemokines, including the  
136 Cxcr3 ligands *Cxcl9/10/11* [Figs. 3e, f]. Notably, the Cxcr3-Stat3 signaling axis has previously  
137 been described to enhance PDA aggressiveness and contribute to an immune suppressive  
138 environment through inducing PD-L1 (CD274) expression<sup>25,26</sup>, and low expression of these  
139 chemokines is correlated with a better prognosis in human PDA patients [Supplementary Fig.  
140 3e]. We therefore hypothesize that downregulation of Cxcr3 ligands contributes to the immune  
141 stimulatory environment triggered by *Rnf31* and *Vps4b* inactivation.

142

### 143 **Rnf31 loss sensitizes PDA to TNF- induced apoptosis via caspase 8**

144 Cytotoxic T cells induce death in target cells via different processes, including the release of  
145 TNF, secretion of granules filled with granzymes and perforins, and by engaging the Fas-FasL  
146 axis. To systematically explore which of these effector mechanisms are sensitized upon *Rnf31*  
147 and *Vps4b* inhibition, we first assessed tumor cell sensitivity to TNF ligands. Interestingly, we  
148 found that parental KPC cells and *Vps4b*<sup>KO</sup> KPC cells were insensitive to TNF-induced  
149 apoptosis, but that *Rnf31*<sup>KO</sup> KPC cells rapidly underwent cell death upon TNF treatment [Fig.  
150 4a]. Engagement of the TNF receptor triggers several signaling branches, including pro-  
151 survival NFκB signaling as well as apoptosis induction via caspase 8 cleavage<sup>27-29</sup>. Notably,  
152 *Rnf31* has previously been reported to function as an E3 ubiquitin-protein ligase within the  
153 linear ubiquitination chain assembly complex (LUBAC), which is involved in regulating NFκB  
154 signaling and in stabilizing anti-apoptotic proteins such as c-Flip<sup>27</sup>. We therefore speculated  
155 that the *Rnf31* knock-out sensitizes tumor cells to TNF-mediated apoptosis either indirectly, by  
156 abrogating NFκB pro-survival signaling, or directly, by facilitating caspase 8 cleavage. When  
157 we first assessed TNF-mediated NFκB activation, we found phosphorylation of the NFκB  
158 subunit p65/Rela in all genetic backgrounds, including *Rnf31*<sup>KO</sup> cells [Fig. 4b], indicating

159 functional NF $\kappa$ B signaling. When we next analyzed caspase 8 cleavage upon TNF treatment,  
160 activation was observed in *Rnf31*<sup>KO</sup> KPC cells but not in parental KPC- or *Vps4b*<sup>KO</sup> KPC cells  
161 [Fig. 4b]. Hence, our data suggest that in Rnf31-deficient cells intact NF $\kappa$ B signaling is not  
162 sufficient to rescue TNF-activated caspase 8 cleavage.

163 To further assess whether loss of Rnf31 also sensitizes human PDA to TNF-mediated cell  
164 death, we next generated patient-derived and engineered human pancreatic cancer organoids  
165 (hPDA) with *RNF31*<sup>KO</sup> mutations, and treated these organoids for four hours with TNF. In line  
166 with results from murine PDA tissues, only *RNF31*<sup>KO</sup> but not *RNF31*<sup>WT</sup> PDA organoids  
167 activated apoptotic cell death upon TNF stimulation [Figs. 4c, d, Supplementary Figs. 4a, b].  
168 Taken together, our results suggest that loss of the LUBAC subunit Rnf31 sensitizes murine  
169 and human pancreatic cancer to CTL killing by rendering cells susceptible to caspase-8-  
170 mediated apoptosis upon TNF signaling [Supplementary Fig. 4c].

171

### 172 **Vps4b depletion impairs functional autophagy and increases intracellular Granzyme B** 173 **levels**

174 As part of endosomal sorting complexes required for transport III (ESCRT-III) Vps4b  
175 functions as an AAA-type ATPase involved in diverse processes regulating protein  
176 homeostasis, including the catalyzation of phagophore closure during autophagy <sup>30</sup>.  
177 Considering that several autophagy-related genes have been identified as sensitizers for CTL-  
178 mediated killing, we reasoned that *Vps4b*<sup>KO</sup> cells might sensitize PDA to CTL-killing by  
179 inhibiting autophagy. To test this hypothesis, we transduced cells with an autophagic flux  
180 reporter, and assessed if autophagy is impaired in *Vps4b* knock-out KPC cells <sup>31</sup>. The reporter  
181 consists of a LC3-GFP-LC3 $\Delta$ G-RFP fusion protein; LC3-GFP is localized to the  
182 autophagosome and degraded during autophagy, and LC3 $\Delta$ G-RFP lacks a C-terminal glycine  
183 and stably resides in the cytoplasm during autophagy [Fig. 5a]. While parental KPC cells  
184 showed a strong upregulation of autophagy upon starvation [Fig. 5b], *Vps4b*<sup>KO</sup> KPC cells  
185 showed an impaired autophagic flux, similar to fully autophagy-deficient *Atg5*<sup>KO</sup> KPC cells  
186 [Fig. 5b]. These data suggest that loss of Vps4b sensitizes PDA to CTL killing through  
187 disrupting autophagy.

188 In a previous study it was suggested that high autophagy rates in PDA contribute to immune  
189 evasion by sequestering surface MHC-I levels <sup>9</sup>. In KPC cells, nevertheless, we observed a  
190 robust induction of MHC-I surface expression upon CTL exposure, which was also not affected  
191 by Vps4b depletion (Fig. 3d). In another model it was suggested that autophagy inhibition

192 facilitates CTL-mediated killing through increasing sensitivity to TNF-induced cell death <sup>11</sup>.  
193 However, we did not observe apoptosis induction when we treated *Vps4b*<sup>KO</sup> KPC cells with  
194 TNF [Fig. 4a]. In addition, when we sensitized KPC cells to TNF-induced apoptosis through  
195 Actinomycin D - a transcriptional inhibitor of pro-survival NFκB signaling - prior to TNF  
196 treatment, *Vps4b*<sup>KO</sup> KPC cells were again not sensitized to increasing TNF concentrations  
197 compared to parental KPC cells [Fig. 5c]. Interestingly, a recent studies found that high  
198 autophagy levels in breast cancer cells promote NK cell-derived granzyme B degradation,  
199 resulting in resistance to cytotoxic immune cells <sup>32,33</sup>. We therefore hypothesized that autophagy  
200 deficiency could sensitize PDA cells to CTL killing through insufficient granzyme B clearance.  
201 Hence, we quantified intracellular granzyme B levels in KPC cells upon OT-I T cell exposure.  
202 Indeed, while OT-I T cells produced comparable amounts of granzyme B, autophagy deficient  
203 *Atg5*<sup>KO</sup>- and *Vps4b*<sup>KO</sup> KPC cells accumulated more granzyme B compared to parental KPC cells  
204 [Figs. 5d, e, Supplementary Fig. 5a]. Taken together, our data suggest that *Vps4b* inhibition  
205 perturbs autophagy and thereby reduces the capability of PDA cells to degrade granzyme B  
206 upon CTL-mediated killing. Importantly, this phenotype was not only limited to *Vps4b*-  
207 deficient cells, but generally linked to PDA cells with impaired autophagy, providing a model  
208 how autophagy influences sensitivity to CTL-mediated killing.

209

### 210 ***Rnf31* and *Vps4b* inhibition increases CTL infiltration and effector function in vivo**

211 To further characterize increased CTL susceptibility of *Rnf31*<sup>KO</sup> and *Vps4b*<sup>KO</sup> KPC cells *in vivo*,  
212 we next analyzed the effect of these mutations on PDA progression and tumor  
213 microenvironment in mice. Therefore, we orthotopically transplanted KPC cells with different  
214 genotypes (wildtype, *Rnf31*<sup>KO</sup> and *Vps4b*<sup>KO</sup>) into C56BL/6 animals, and assessed survival and  
215 tumor weight, as well as immune cell composition and effector function using flow cytometry  
216 [Fig. 6a, Supplementary Fig. 6d]. While remaining Cas9 expression in these lines did not affect  
217 tumor growth [Supplementary Fig. 6a], loss of *Rnf31* and *Vps4b* markedly decreased tumor  
218 mass and resulted in significantly enhanced survival of tumor-bearing mice [Fig. 6b]. In case  
219 of *Vps4b*<sup>KO</sup> tumors the effect was strongly dependent on adaptive immunity, since tumor mass  
220 reduction was not apparent in RAG1<sup>-/-</sup> mice [Supplementary Fig. 6b]. *Rnf31*<sup>KO</sup> tumors,  
221 however, also showed reduced growth compared to KPC<sup>WT</sup> tumors in RAG1-deficient hosts,  
222 most likely due to the continued expression of TNF and other death receptor ligands by NK  
223 cells [Supplementary Fig. 6b]. We next analyzed immune cell infiltration and CD8<sup>+</sup> T cell  
224 effector function across the different tumor genotypes. While loss of *Vps4b* and *Rnf31* did not

225 cause significant changes in macrophages, CD11c<sup>+</sup> dendritic cells, CD4<sup>+</sup> T helper cells, NK  
226 cells and CD4<sup>+</sup> Foxp3<sup>+</sup> regulatory T cells, we detected a minor increase of neutrophils in  
227 *Rnf31*<sup>KO</sup> tumors [Fig. 6c, Supplementary Fig. 6c]. In addition, we observed a substantial  
228 increase of infiltrating CD8<sup>+</sup> T cells in *Vps4b*<sup>KO</sup> and *Rnf31*<sup>KO</sup> tumors compared to parental KPC  
229 tumors [Fig. 6c]. Further analysis of CD8<sup>+</sup> CTL markers for effector function revealed a  
230 significant reduction in exhausted PD1<sup>+</sup> CD8<sup>+</sup> T cells in *Vps4b*<sup>KO</sup> and *Rnf31*<sup>KO</sup> tumors [Fig. 6d],  
231 concomitant with an increase in cytokine production; in *Rnf31*<sup>KO</sup> tumors TNF production and  
232 in *Vps4b*<sup>KO</sup> tumors TNF and IFN $\gamma$  production was increased in infiltrating CD8<sup>+</sup> T cells [Fig.  
233 6d]. Together, these findings demonstrate that loss of *Rnf31* and *Vps4b* sensitize PDA to CTL-  
234 mediated killing also in a non-cell-autonomous manner, through increasing CTL effector  
235 function, thereby feeding into a forward loop with cell-autonomous mechanisms to enhance  
236 anti-tumor immunity.

237

### 238 **Discussion:**

239 Several recent studies performed CRISPR screening in PDA to study metastasis formation,  
240 metabolic vulnerabilities, combinatorial drug targeting and therapy resistance <sup>21,34–36</sup>. Here, we  
241 applied *in vitro* and *in vivo* CRISPR screening in PDA to interrogate tumor intrinsic  
242 mechanisms of immune evasion. One of the strongest sensitizers to CTL-mediated killing was  
243 *Rnf31*, for which we show that its inactivation facilitates TNF-induced apoptosis via caspase 8  
244 cleavage. Notably, previous work has already linked TNF resistance to immune evasion <sup>11,37</sup>.  
245 However, these studies have been conducted in a TNF-susceptible colorectal cancer cell line  
246 (MC38), impeding the identification of TNF sensitizers such as *Rnf31*. In contrast, KPC  
247 pancreatic cancer cells are intrinsically resistant to TNF, which allowed us to unravel a  
248 mechanism that abates TNF resistance.

249 Another strong sensitizer to CTL-mediated killing identified in our screen was *Vps4b*, which  
250 could be linked to autophagy. Autophagy has recently been postulated as an important  
251 modulator of anti-tumor immunity in several cancer entities <sup>9–11,38</sup>. However, in contrast to  
252 previous findings we did not observe increased MHC-I antigen presentation <sup>9</sup> or enhanced  
253 TNF-induced apoptosis <sup>10,11</sup> upon autophagy inhibition. Instead, we provide evidence that  
254 impaired autophagy leads to reduced granzyme B clearance, suggesting that *Vps4b* or *Atg5*  
255 depletion facilitates tumor cell lysis by CD8<sup>+</sup> T cells through enhanced granzyme B  
256 accumulation.



257 Taken together, we used functional genomics approaches to identify mechanisms for  
258 circumventing immune evasion in PDA. Analysis of two of the strongest hits, *Vps4b* and *Rnf31*,  
259 demonstrated that their inhibition sensitizes tumor cell clearance directly, via cell-autonomous  
260 mechanisms, and indirectly, by increasing the number and functionality of intertumoral CD8<sup>+</sup>  
261 T cells. Our insights in sensitizing pancreatic cancer to the host immune system could open up  
262 novel strategies to enhance the efficacy of T cell-mediated tumor killing, potentially allowing  
263 PDA patients to benefit from the vast advances made in the field of cancer immunotherapy in  
264 the future.

265 **Methods:**

266

267 **Animals:**

268 Wildtype C57/BL6 mice were obtained from Charles River Laboratories. RAG1<sup>-/-</sup>  
269 (NOD.129S7(B6)-*Rag1*<sup>tm1Mom/J</sup>) and OT-I (C57BL/6-Tg(*TcraTcrb*)1100Mjb/J) were obtained  
270 from Jackson Laboratories and bred in-house. All animals were housed in a pathogen-free  
271 animal facility in cages with up to five animals at the Institute of Molecular Health Sciences at  
272 ETH Zurich and kept in a temperature- and humidity-controlled room on a 12h light–dark  
273 cycle. All animal experiments were performed in accordance with protocols approved by the  
274 Kantonales Veterinäramt Zurich in compliance with all relevant ethical regulations.

275

276 **Cell culture:**

277 The KPC cell line (C57/BL6 background) was generated by Dr. Jen Morton (Beatson Institute)  
278 and purchased at Ximbio (Cat# 153474). KPC cells were derived from primary KPC tumors  
279 obtained from Pdx-Cre; *Kras*<sup>G12D/+</sup>; *Trp53*<sup>R172H/+</sup> mice. All KPC lines used in this study were  
280 cultured in Iscove's Modified Dulbecco's Medium (IMDM, 31980030, Gibco) supplemented  
281 with 10% fetal bovine serum (FBS), 1% penicillin/streptomycin (Gibco) and 50  $\mu$ M  $\beta$ -  
282 Mercaptoethanol (Gibco). Cells were incubated at 37°C in 5% CO<sub>2</sub>. The parental KPC line was  
283 engineered with Lenti-Cas9-Hygromycin and Lenti-Ovalbumin-mCherry-Blasticidin  
284 constructs (for details see “Plasmids”) in order to express Cas9 and full-length Ovalbumin  
285 (KPC-Cas9-OVA).

286

287 **Plasmids:**

288 For generation of Lenti-EF1 $\alpha$ -Cas9-P2A-HygromycinR we replaced Blasticidin from the  
289 original vector (Addgene #52962) by HygromycinR using Gibson Assembly. For generation  
290 of Lenti-EF1 $\alpha$ -Ovalbumin-P2A-mCherry-P2A-BlasticidinR, we replaced Cas9 (Addgene  
291 #52962) by Ovalbumin-P2A-mCherry derived from the original vector (Addgene #113030)  
292 with Gibson Assembly. The LC3-GFP-LC3 $\Delta$ G-RFP construct was obtained from Addgene  
293 (#84572) and cloned into Lenti-EF1 $\alpha$ -Cas9-P2A-BlasticidinR by replacing Cas9-P2A-  
294 BlasticidinR. The following vectors LentiGuide-Puro (#52963), LentiCRISPRv2-puro  
295 (#98290) and pLenti-PGK-Hygro-KRAS(G12V) (#35635) were obtained from Addgene.

296

297 **Lentivirus production:**

298 For lentivirus production of CRISPR libraries, transgenes or single guide HEK293T cells were  
299 transfected with, HEK293T cells (ATCC) were seeded in T175 cell culture flasks in DMEM  
300 (Gibco) supplemented with 10% FBS and 1% Penicillin/Streptomycin and grown up to 70%  
301 confluency. HEK293T cells were transfected with the following mixture: 10.4  $\mu$ g psPAX2-  
302 Plasmid, 3.5  $\mu$ g pMD2.G, 13.8  $\mu$ g lentiviral vector of interest (see section “Plasmids”) in a  
303 volume of 1000  $\mu$ l Opti-MEM (Gibco) in tube 1. In a second tube, 138  $\mu$ l 1mg/mL PEI  
304 (Polysciences) was mixed with 862  $\mu$ l Opti-MEM. Both tubes were incubated at room  
305 temperature for 5 min, mixed, and incubated again 20 min at room temperature and added to  
306 the cells in the evening. The next morning, medium was refreshed. After 48h and 72h, the  
307 supernatant was harvested, filtered with 0.45  $\mu$ m syringe filters (Sarstedt) and concentrated by  
308 centrifugation at 24,000 g for 2h. Plasmids psPAX2 (Addgene #12260) and pMD2.G (Addgene  
309 #12559) were gifts from Didier Trono.

310

311 Genome wide CRISPR screen:

312 The genome-wide Brie CRISPR-KO library (4 sgRNAs per gene; ~ 80.000 sgRNAs) was  
313 purchased from Addgene (#73632) and amplified according to the supplier’s protocol. KPC-  
314 Cas9-OVA were infected with the lentiviral Brie CRISPR-KO library at a multiplicity of  
315 infection (MOI) of 0.3 while keeping a 500x coverage of the library. One day post transduction,  
316 cells were selected with 2  $\mu$ g/ml Puromycin for 5 days in order to select for successfully  
317 transduced cells and to allow gene CRISPR-mediated gene knockout. For OT-I T-cell co-  
318 culture, 4x10<sup>7</sup> KPC cells were plated at a final confluency around 60% and incubated for 3  
319 days together with activated T-cells at an E:T ratio of 1:1. After T-cell killing, surviving KPC  
320 cells were left to recover for another 3 days. Untreated KPC-Cas9-OVA-Brie cells were  
321 cultured alongside and harvested for DNA isolation together with OT-I treated cells. For each  
322 replicate and sample, DNA was isolated from 4x10<sup>7</sup> KPC cells using the Blood & Cell Culture  
323 DNA Maxi Kit (Qiagen). NGS libraries were prepared using the following primers:

324 Staggered P5 forward primer:

325 5’AATGATACGGCGACCACCGAGATCTACACTCTTTCCCTACACGACGCTCTTCCG  
326 ATCT[N<sub>1-8</sub>]T TGTGGAAAGGACGAAACACCG

327 Barcoded P7 reverse primer:

328 5’CAAGCAGAAGACGGCATAACGAGATNNNNNNNNGTGACTGGAGTTCAGACGTG  
329 TGCTCTT CCGATCTTCTACTATTCTTTCCCTGCACTGT

330 For each sample, total DNA obtained from  $4 \times 10^7$  cells was used as input with  $10 \mu\text{g}$  DNA per  
331  $100 \mu\text{l}$  PCR reaction. DNA was amplified using Herculase II Fusion DNA Polymerase  
332 (Agilent) according to the manufacturer's conditions with  $2 \mu\text{l}$  Herculase II and  $2.5 \text{ mM}$   $\text{MgCl}_2$ .  
333 Annealing was performed at  $55^\circ\text{C}$  and a total of 24 cycles. PCR reactions were cleaned up  
334 using 0.8x AMPure beads (Beckman Coulter). NGS libraries were run on the Illumina  
335 NovaSeq 6000 System generating 100 bp single-end reads.

336

337 Data analysis:

338 Demultiplexed reads were trimmed to exact 20 bp (sgRNA) using cutadapt. Subsequently, read  
339 counts were assed using MAGeCK (v0.5.6) as well as sgRNA enrichment/depletion with  
340 “mageck test -k *readcounts.txt* -t OT-I -c CTRL --norm-method control --control-sgrna  
341 *nontargeting.txt*”. For MAGeCK analysis three biological screening replicates were pooled.  
342 For pathway analysis of gene enrichment/depletion the cut-off was set at  $\text{FDR} < 0.1$  and GO  
343 term analysis for candidates was performed using the Molecular Signature Database  
344 (MSigDB). The screening data set can be found in Tables S1 and S2 and via the GEO accession  
345 number GSE180834.

346

347 Isolation and activation of CD8 T-cells:

348  $\text{CD8}^+$  OT-I T-cells were isolated from spleen, axillary and inguinal lymph nodes from OT-I  
349 mice.  $\text{CD8}^+$  cells were enriched using magnetic beads for MACS (130-104-075, Milteny  
350 Biotec). T-cells were cultured in IMDM supplemented with 10% fetal bovine serum (FBS),  
351 1% penicillin/streptomycin (Gibco),  $50 \mu\text{M}$   $\beta$ -Mercaptoethanol (Gibco) and  $100 \text{ ng/ml}$  Il-2  
352 (Peprotech). Cells were kept at  $37^\circ\text{C}$  in 5%  $\text{CO}_2$ . After T-cell isolation, cells were activated for  
353 24h using  $2 \mu\text{g/ml}$  of anti-Cd28 and anti-Cd3 $\epsilon$  antibodies (102116 and 100340, BioLegend).

354

355 In vitro cytotoxicity assays:

356 One day prior to OT-I co-culture, a total of  $5 \times 10^4$  Ovalbumin-expressing KPC cells were plated  
357 into 24-well plates. For competition assays, KPC-Cas9-OVA-mCherry (with CRISPR-KO of  
358 indicated gene) and KPC-Cas9-OVA-EGFP-sgRNA@ctrl were plated in a 1:1 ratio. Activated  
359 OT-I T-cells were added in the presence of  $100 \text{ ng/ml}$  Il-2 for one to two days, depending on  
360 downstream analysis. EGFP:mCherry ratio was assessed using flow cytometry. In brief, cells  
361 were trypsinized, spun down and washed in FACS buffer (2% FBS, 2mM EDTA in PBS). For  
362 MHC class I assessment, cells were detached using 5 mM EDTA. The following antibodies  
363 were used: CD8a-APC (1:600), CD8a-FITC (1:600), H-2Kb-APC (1:100), SIINFEKL-H-2Kb-

364 APC (1:100; all Biolegend). SYTOX Blue was used as viability dye. For intracellular  
365 Granzyme-B staining (GzmB-FITC; GB11; BioLegend) cells were stained with eFluor780  
366 (fixable viability dye) and stained with 4% formalin before permeabilization. GzmB-FITC  
367 staining was carried out in permeabilization buffer for 30 min at room temperature. The  
368 following sgRNAs were cloned into the LentiGuide-puro vector and stably integrated as a pool  
369 per gene into target cells: *Ctrl-1*: 5' GCGAGGTATTCGGCTCCGCG, *Rnf31-1*: 5'  
370 CTACCTCAACACCCTATCCA, *Rnf31-2*: 5' CCACCGTGCTGCGAAAGACG, *Rnf31-3*: 5'  
371 TTCACTGAGCGCCAATACCG, *Vps4b-1*: 5' TAAAGCCAAGCAAAGTATCA, *Vps4b-2*:  
372 5'CGATAGAGCAGAAAACTAA, *Vps4b-3*: 5' TCAGGCCCAGTTGATGAGAA, *Stat1*:  
373 5' GGATAGACGCCCAGCCACTG, *Atg5*: 5' AAGAGTCAGCTATTTGACGT.

374  
375 Autophagy flux assay:

376 LC3-GFP-LC3 $\Delta$ G-RFP construct was stably integrated into KPC-Cas9-OVA cells and  
377 GFP<sup>+</sup>/RFP<sup>+</sup> single cell clones were sorted and expanded. Cells were starved for 8 hours in 2%  
378 FBS/PBS at 37°C in ambient CO<sub>2</sub>. Subsequently, cells were collected for flow cytometry  
379 analysis in order to assess GFP and RFP expression. The autophagic flux was assessed by  
380 calculating the GFP/RFP ratio and comparison to the non-starved control condition.

381  
382 Human pancreatic cancer organoids:

383 Normal human pancreatic organoids (hPan) and pancreatic cancer organoids (hPDA) were  
384 generated as described elsewhere<sup>39</sup>. Expansion medium (EM) contained Advanced  
385 DMEM/F12 supplemented with 10 mM HEPES, 1x Glutamax, 1% Penicillin/Streptomycin, 1x  
386 B27 without vitamin A (all Gibco), 1.25 mM N-acetylcysteine (Sigma), 25% WNT3A-  
387 conditioned medium (CM), 10% RSPO1-CM, 10% NOGGIN-CM (all CM produced in-  
388 house), 10 mM Nicotinamide (Sigma), 50 ng/mL human EGF (Peprotech), 100 ng/ml FGF10  
389 (Peprotech), 10 nM Gastrin (Tocris Bioscience), 0.5  $\mu$ M TGF- $\beta$  type I receptor inhibitor A83-  
390 01 (Tocris Bioscience) and 1  $\mu$ M PGE2 (Tocris Bioscience). Organoids were split every 7-10  
391 days using TrypLE Express (Gibco) and fire-polished Pasteur pipettes in a 1:3 – 1:4 ratio. After  
392 passaging, organoids were plated in 20  $\mu$ l drops of Matrigel (Corning) and overlaid with EM  
393 supplemented having 10  $\mu$ M RhoKinase inhibitor (Y-27632; Abmole). Organoids from healthy  
394 donors were lentivirally transduced to express oncogenic *KRAS*<sup>G12V</sup> and to knockout *TP53*  
395 (hPan-KP). Both, hPan-KP and hPDA organoids were transduced with LentiCRISPRv2-puro  
396 to knockout *RNF31*. For lentiviral transduction, 3 – 4 full drops of organoids per condition  
397 were processed into single cells, mixed with 500  $\mu$ l EM + 10  $\mu$ M RhoKinase inhibitor + 50  $\mu$ l

398 concentrated virus and spun for one hour at 32°C at 300 g in a 24-well plate. After 3 – 4 hours  
399 incubation at 37°C, cells were collected and plated in Matrigel. Organoid were selected with  
400 1.5 µg/ml puromycin (*RNF31*-KO), 10 µM Nutlin-3a (*TP53*-KO; Sigma) and 300 µg/ml  
401 hygromycin (*Kras*<sup>G12V</sup>). The following sgRNAs were used - *TP53*: 5'  
402 GAAGGGACAGAAGATGACAG, *RNF31-1*: 5' CCACCGTGCTGCGAAAGACA, *RNF31-*  
403 *2*: 5' CCCAACCCCTTACAGCCTCG, *RNF31-3*: 5' GGATCATGCTCACTAGCTGG.

404

405 Sublibrary generation:

406 For sublibrary generation, the top candidates (enriched and depleted; FDR < 10%) were  
407 selected (Table S3). If there were many genes within one pathway, only a couple of genes was  
408 selected to avoid redundancy. For each gene of the gene list (63 candidates and Ovalbumin) 10  
409 sgRNAs (7 sgRNAs for Ovalbumin) were designed with the GPP sgRNA designer (Broad  
410 Institute). A total of 600 non-targeting controls was likewise included. Oligonucleotides having  
411 BsmBI (EspI) restriction sites, a single guide RNA sequence as well as primer binding sites for  
412 oligo pool amplification were synthesized (Twist Bioscience). Oligo sequences can be found  
413 in Table S3. PCR amplification of the oligo pool prior to cloning was done according to the  
414 manufacturer's protocol. For cloning the oligo pool into the appropriate lentiviral backbone the  
415 following reaction was set up: 5 µl 10x Cutsmart buffer (NEB), 1 mM DTT (final), 1 mM ATP  
416 (final), 1.5 µl T4 DNA Ligase (8000U, NEB), 1.5 µl EspI (NEB), 100 ng oligo pool PCR  
417 product and 500 ng vector (LentiGUIDE-puro, EspI-digested and isopropanol purified) and  
418 water up to 50 µl. The reaction was incubated for 100 cycles at 5 min 37°C followed by 5 min  
419 20°C. After isopropanol clean-up, the ligation was transformed into NEB Stable Competent *E.*  
420 *coli* (C3040I) and streak out onto LB agar plates. Library integrity was confirmed using  
421 Illumina sequencing.

422

423 In vivo sublibrary screen:

424 KPC-Cas9-OVA cells were transduced with the lentiviral sublibrary at a MOI of 0.3 and  
425 selected for four days with 2 µg/ml Puromycin. Subsequently, 150.000 KPC-Cas9-OVA-  
426 Sublibrary cells were orthotopically transplanted into *Rag1*<sup>-/-</sup> mice. On day 16 post  
427 transplantation 1 x 10<sup>6</sup> preactivated OT-I CD8<sup>+</sup> T-cells were adoptively transferred  
428 (intravenously) into tumor bearing mice. Mice were sacrificed on day 21 post transplantation  
429 and tumors were harvested. Tumor DNA was isolated using the Qiagen Blood and Tissue Kit  
430 and sgRNA cassette was amplified similarly to the *in vitro* screen and analyzed by Illumina

431 sequencing. Single guide RNA representation was assed using MAGeCK (v0.5.6) by  
432 comparison to the plasmid sublibrary. The screening data set can be found in Table S3 and via  
433 the GEO accession number GSE180834.

434

435 Transplantations:

436 Mice were anesthetized using isoflurane at a constant flow rate. Abdomen was shaved and  
437 sterilized before small incision in the upper left quadrant was made. The pancreas was carefully  
438 put onto a cotton-swab and  $1.5 \times 10^5$  KPC cells were injected in 50  $\mu$ l of PBS:Matrigel (1:1)  
439 using a 29G needle. Successful injection was confirmed when a liquid bled formed and no  
440 leakage could be observed. Peritoneum and skin were subsequently sutured with Vicryl violet  
441 sutures (N385H, Ethicon) and secured with wound clips (FST). Approximately three weeks  
442 post transplantations animals were sacrificed and tumors were isolated, weighed and processed  
443 for subsequent analysis. For subcutaneous transplantations, C57BL/6 mice were injected with  
444  $1 \times 10^6$  KPC or KPC-Cas9 cells per flank mix in 1:1 PBS:Matrigel. Tumors were measured with  
445 calipers and the volume was estimated via the equation  $(L \times W^2)/2$ .

446

447 Flow cytometry for tumor microenvironment analysis:

448 For flow cytometry analysis orthotopic tumors were collected and minced into small pieces  
449 before digestion in Collagense IV (6000 U/ml) and DNase I (200 U/ml) for one hour at 37°C.  
450 Cell suspension was filtered through a 40  $\mu$ m cell strainer. For cytokine stainings, cells were  
451 restimulated with PMA (100 nM), ionomycin (1  $\mu$ g/ml) and monensin (2  $\mu$ g/ml) for 3-4 hours  
452 at 37°C in complete IMDM medium (Gibco). Viability staining was performed using the  
453 fixable viability dye eFluor780. Staining with fluorescent antibodies was carried out for 15 min  
454 at 4°C in the dark. After washing in FACS buffer (2 mM EDTA, 2 % FBS), cell suspension  
455 was acquired using BD Fortessa and FlowJo software (Treestar).

456

457 Antibodies used for flow cytometry:

458 PD-1 FITC (J43; eBioscience), NK1.1 PE (PK136; eBioscience), CD3e PE-Dazzle594 (145-  
459 2C11; BioLegend), CD3e PE (145-2C11; eBioscience), FoxP3 PerCP-Cy5.5 (FJK-16s;  
460 eBioscience), CD8a PE-Cy7 (53-6.7; eBioscience), CD8a APC (53-6.7; eBioscience), CD8a  
461 PerCP-Cy5.5 (53-6.7; eBioscience), TCRb AF700 (H57-597; BioLegend), CD45 BV785 (30-  
462 F11; BioLegend), CD4 BV711 (GK1.5; BioLegend), CD19 BV650 (6D5; BioLegend), CD19  
463 PE (1D3; eBioscience), CD11b BV605 (M1/70; BioLegend), CD11b BV510 (M1/70;

464 BioLegend), CD11c BV605 (N418; BioLegend), Siglec-F PE (E50-2440; BD Biosciences),  
465 F4/80 APC (BM8; BioLegend), Ly-6G AF 700 (1A8; BioLegend), MHC II BV650  
466 (M5/114.15.2; BioLegend), CD64 BV421 (X54-5/7.1; BioLegend), TNF FITC (MP6-XT22;  
467 BioLegend), IFN $\gamma$  PE-Cy7 (XMG1.2; BD Biosciences), GzmB FITC (GB11; BioLegend).  
468 Gating strategy is depicted in Supplementary Figure 6d.

469

470 RNA-Seq:

471 After 6h of co-culture, OT-I T-cells and KPC-Cas9-OVA cancer cells were sorted using the  
472 BD Aria cell sorter. KPC cells expressed mCherry, T-cells were stained with CD8a-APC (clone  
473 53-6.7; Biolegend 100711) to separate both populations. RNA was isolated with the Qiagen  
474 RNeasy Mini Kit and sent to the Functional Genomic Center Zurich (FGCZ) for standard  
475 library preparation and Illumina sequencing. Reads were trimmed using cutadapt and mapped  
476 to the mouse genome GRCm38 with HISAT2 followed by sorting using samtools. The raw  
477 count matrix was generated in RStudio using Rsubread. Differential gene (DE) expression  
478 analysis was performed with EdgeR and differentially expressed genes ( $LFC \pm 1$ ;  $FDR < 0.1$ )  
479 were used as input for GO term analysis using the Molecular Signature Database (MSigDB).  
480 RNA-Seq data can be accessed via GEO.

481

482 TNF treatment of KPC cells:

483 KPC cells were treated 24h with the indicated TNF concentration and stained subsequently for  
484 immunofluorescence (see below) or with crystal violet to assess cell viability (here in the  
485 presence of 1  $\mu$ g/ml Actinomycin D). Crystal violet dye was reconstituted in 10% acetic acid  
486 and absorbance was measured at 595 nm.

487

488 Immunofluorescence of KPC cells:

489 Cells were grown on glass cover slips, treated with TNF (100 ng/ml) and fixed for 10 minutes  
490 at room temperature in 4% PFA. Cells were permeabilized and blocked in 0.5% Triton-X, 5%  
491 normal donkey serum in PBS. Cleaved caspase 3 antibody (1:400, Cell signaling Technology,  
492 9664) was diluted in blocking solution and incubated overnight at 4°C. Coverslips were washed  
493 in PBS and incubated 2h at room temperature with secondary antibody (Donkey anti-rabbit-  
494 568, ThermoFisher Scientific, 1:400) and DAPI. Coverslips were mounted with Prolong Gold  
495 (ThermoFisher Scientific) and imaged with a Lunaphore.

496



497 Whole mount staining of human pancreatic cancer organoids:

498 Wildtype or *RNF31*<sup>KO</sup> hPan/hPDA organoids were treated for 4h with 100 ng/ml human TNF  
499 (Peprotech) in 8-well  $\mu$ -slides (Ibidi). After fixation in 4% PFA, organoids were blocked and  
500 permeabilized in blocking solution (10 % normal donkey serum; 0.5% Triton-X in PBS). All  
501 antibody incubations were performed overnight at 4°C on a rocking platform. Primary  
502 antibodies: E-Cadherin (1:500, R&D Systems, AF748), cleaved Caspase 3 (1:400, Cell  
503 Signaling Technology, 9664). Donkey-anti-goat 488 and donkey-anti-rabbit 568 were used as  
504 secondary antibodies and counterstained with DAPI. Organoids were mounted with ProLong  
505 Gold. Confocal Images were taken with a Zeiss LSM 880 Airyscan.

506

507 Western Blot:

508 Whole cell lysates were prepared in RIPA buffer (50mMTris-HCl pH 8.0, 150mMNaCl, 0.1%  
509 SDS, 0.5% Na-Deoxycholate, 1%IGEPAL CA-630) supplemented with PhosSTOP  
510 phosphatase inhibitors and cOmplete protease inhibitor cocktail (both Roche). BCA protein  
511 assay (ThermoScientific) was used for protein quantification. Samples were loaded on 4%–  
512 15% precast polyacrylamide gels (Bio-Rad) and transferred to PVDF (Bio-Rad) membranes in  
513 Towbin buffer. Membranes were blocked in 5% Bovine Serum Albumin (Applichem) and  
514 incubated overnight in primary antibodies phospho-p65 (1:1000; CST#3033), Caspase 8  
515 (1:1000; CST#4790), cleaved Caspase 8 (1:1000, CST#8592) and Gapdh (1:3000;  
516 CST#14C10). IRDye800CW and 680RD donkey anti-rabbit secondary antibodies were used  
517 for detection (LI-COR). Protein bands were visualized with the ODYSSEY CLx imaging  
518 system (LI-COR).

519

520 Statistics:

521 To compare data from experiments we either applied student's unpaired, two-tailed T-test or  
522 One-Way ANOVA analysis, as indicated in the respective figure legend. A minimum of three  
523 independent biological replicates was performed per experiment. P values less than 0.05 were  
524 considered significant and significance levels were set as follows: \*p < 0.05, \*\*p < 0.01, \*\*\*p  
525 < 0.001. Statistical comparisons were performed using RStudio and GraphPad Prims 9.

526

527 **Data and materials availability:**

528 RNA-Seq data and CRISPR screening data have been made accessible via GEO: GSE180834.  
529 KPC cell line was received from Ximbio (Cat# 153474), including a materials transfer  
530 agreement.

531

532

533

534

535 **Acknowledgement:**

536 We thank the Flow Cytometry Facilities of the University of Zurich and the ETH Zurich. Also,  
537 we thank the Functional Genomics Center Zurich and the ETH Phenomics Center for their  
538 support and infrastructure.

539

540 **Funding:**

541 Swiss National Science Foundation grant 310030\_185293 (GS)

542 Swiss National Science Foundation grant 310030B\_182829 (MK)

543 ETH PhD Fellowship (NF)

544 PHRT iDoc Fellowship PHRT\_324 (KM)

545 EMBO Long-Term 499 Fellowship ALTF 873-2019 (SJ)

546

547 **Author Information:**

548 N.F. and G. S. conceptualized the study, performed experiments, analyzed the data and wrote  
549 the manuscript. L.T. designed, supervised and analyzed flow cytometry experiments and gave  
550 valuable input throughout the course of the project. S.J. helped analyzing RNA-Seq data. D.E.,  
551 K.F.M., T.R. and F.A. performed experiments. N.F. and G.S. wrote the manuscript, L.T. and  
552 M.K. reviewed and edited the manuscript. G.S. supervised the study. G.S. and M.K. acquired  
553 funding. All authors approved the final version of the manuscript.

554

555 **Competing interests:** Authors declare that they have no competing interests.

556

557 **Supplementary Information:**

558 Supplementary Figures 1 – 6

559 Supplementary Tables 1 – 3

560 Supplementary References

561

562

563 **References:**

- 564 1. Zhang, Y., Crawford, H. C. & Pasca Di Magliano, M. Epithelial-Stromal Interactions  
565 in Pancreatic Cancer. (2018). doi:10.1146/annurev-physiol-020518
- 566 2. Zhang, Y. *et al.* Regulatory T cell depletion alters the tumor microenvironment and  
567 accelerates pancreatic carcinogenesis. Running title: Treg depletion accelerates  
568 pancreatic carcinogenesis. *Author Manuscr. Publ. OnlineFirst* (2020).  
569 doi:10.1158/2159-8290.CD-19-0958
- 570 3. Royal, R. E. *et al.* Phase 2 trial of single agent ipilimumab (Anti-CTLA-4) for locally  
571 advanced or metastatic pancreatic adenocarcinoma. *J. Immunother.* **33**, 828–833  
572 (2010).
- 573 4. Steele, N. G., Carpenter, E. S., Kemp, S. B. & Sirihorachai, V. R.  Multimodal  
574 mapping of the tumor and peripheral blood immune landscape in human pancreatic  
575 cancer. *Nat. Cancer* (2020). doi:10.1038/s43018-020-00121-4
- 576 5. Yarchoan, M., Hopkins, A. & Jaffee, E. M. Tumor Mutational Burden and Response  
577 Rate to PD-1 Inhibition. *N. Engl. J. Med.* **377**, 2500–2501 (2017).
- 578 6. Juneja, V. R. *et al.* PD-L1 on tumor cells is sufficient for immune evasion in  
579 immunogenic tumors and inhibits CD8 T cell cytotoxicity. *J. Exp. Med.* **214**, 895–904  
580 (2017).
- 581 7. Carpenter, E. S., Steele, N. G. & Pasca di Magliano, M. Targeting the  
582 Microenvironment to Overcome Gemcitabine Resistance in Pancreatic Cancer. *Cancer*  
583 *Res.* **80**, 3070–3071 (2020).
- 584 8. Hegde, S. *et al.* Dendritic Cell Paucity Leads to Dysfunctional Immune Surveillance in  
585 Pancreatic Cancer. *Cancer Cell* **37**, 289–307.e9 (2020).
- 586 9. Yamamoto, K. *et al.* Autophagy promotes immune evasion of pancreatic cancer by  
587 degrading MHC-I. *Nat.* **2020** 1–6 (2020). doi:10.1038/s41586-020-2229-5
- 588 10. Lawson, K. A. *et al.* Functional genomic landscape of cancer-intrinsic evasion of  
589 killing by T cells. *Nature* **586**, 1–7 (2020).
- 590 11. Young, T. M. *et al.* Autophagy protects tumors from T cell-mediated cytotoxicity via  
591 inhibition of TNF $\alpha$ -induced apoptosis. *Sci. Immunol* **5**, (2020).
- 592 12. Manguso, R. T. *et al.* In vivo CRISPR screening identifies Ptpn2 as a cancer  
593 immunotherapy target. *Nature* **547**, 413–418 (2017).
- 594 13. Pan, D. *et al.* A major chromatin regulator determines resistance of tumor cells to T  
595 cell-mediated killing. (2018).

- 596 14. Patel, S. J. *et al.* Identification of essential genes for cancer immunotherapy. *Nature*  
597 **548**, 537–542 (2017).
- 598 15. Dong, M. B. *et al.* Dhx37 modulates CD8 T cell activation, cytokine production, and  
599 cytotoxicity d DHX37 interacts with PDCD11 and influences NF-kB activity. (2019).  
600 doi:10.1016/j.cell.2019.07.044
- 601 16. Dubrot, J. *et al.* In vivo screens using a selective CRISPR antigen removal lentiviral  
602 vector system reveal immune dependencies in renal cell carcinoma. *Immunity* **54**, 571-  
603 585.e6 (2021).
- 604 17. Shifrut, E. *et al.* Genome-wide CRISPR Screens in Primary Human T Cells Reveal  
605 Key Regulators of Immune Function. *Cell* **175**, 1958-1971.e15 (2018).
- 606 18. Li, F. *et al.* In vivo epigenetic crispr screen identifies asf1a as an immunotherapeutic  
607 target in kras-mutant lung adenocarcinoma. *Cancer Discov.* **10**, 270–287 (2020).
- 608 19. Doench, J. G. *et al.* Optimized sgRNA design to maximize activity and minimize off-  
609 target effects of CRISPR-Cas9. *Nat. Biotechnol.* **34**, 184–191 (2016).
- 610 20. Vredevoogd, D. W. *et al.* Augmenting Immunotherapy Impact by Lowering Tumor  
611 TNF Cytotoxicity Threshold. *Cell* **178**, 585-599.e15 (2019).
- 612 21. Biancur, D. E. *et al.* Functional Genomics Identifies Metabolic Vulnerabilities in  
613 Pancreatic Cancer. *Cell Metab.* **33**, 199-210.e8 (2020).
- 614 22. Ishizuka, J. J. *et al.* Loss of ADAR1 in tumours overcomes resistance to immune  
615 checkpoint blockade. *Nature* **565**, 43–48 (2019).
- 616 23. Wang, Y. *et al.* Down Regulation of c-FLIPL Enhance PD-1 Blockade Efficacy in B16  
617 Melanoma. *Front. Oncol.* **9**, 857 (2019).
- 618 24. Luebke, T. *et al.* c-FLIP and CD95 signaling are essential for survival of renal cell  
619 carcinoma. *Cell Death Dis.* **10**, 1–12 (2019).
- 620 25. Karin, N. CXCR3 Ligands in Cancer and Autoimmunity, Chemoattraction of Effector  
621 T Cells, and Beyond. *Frontiers in Immunology* **11**, 976 (2020).
- 622 26. Zhang, C. *et al.* CXCL9/10/11, a regulator of PD-L1 expression in gastric cancer.  
623 *BMC Cancer* **18**, (2018).
- 624 27. Tang, Y. *et al.* Linear ubiquitination of cFLIP induced by LUBAC contributes to TNF-  
625 induced apoptosis. *J. Biol. Chem.* **293**, 20062–20072 (2018).
- 626 28. Hrdinka, M. & Gyrd-Hansen, M. Molecular Cell The Met1-Linked Ubiquitin  
627 Machinery: Emerging Themes of (De)regulation. *Mol. Cell* **68**, 265–280 (2017).
- 628 29. Oikawa, D., Sato, Y., Ito, H. & Tokunaga, F. Linear ubiquitin code: Its writer, erasers,

- 629 decoders, inhibitors, and implications in disorders. *International Journal of Molecular*  
630 *Sciences* **21**, 3381 (2020).
- 631 30. Takahashi, Y. *et al.* An autophagy assay reveals the ESCRT-III component CHMP2A  
632 as a regulator of phagophore closure. *Nat. Commun.* **9**, 1–13 (2018).
- 633 31. Kaizuka, T. *et al.* An Autophagic Flux Probe that Releases an Internal Control. *Mol.*  
634 *Cell* **64**, 835–849 (2016).
- 635 32. Baginska, J. *et al.* Granzyme B degradation by autophagy decreases tumor cell  
636 susceptibility to natural killer-mediated lysis under hypoxia. *Proc. Natl. Acad. Sci. U.*  
637 *S. A.* **110**, 17450–17455 (2013).
- 638 33. Chollat-Namy, M. *et al.* The pharmacological reactivation of p53 function improves  
639 breast tumor cell lysis by granzyme B and NK cells through induction of autophagy.  
640 *Cell Death Dis.* **10**, 1–20 (2019).
- 641 34. Milton, C. K. *et al.* A genome-scale CRISPR screen identifies the ERBB and mTOR  
642 signaling networks as key determinants of response to PI3K inhibition in pancreatic  
643 cancer. *Mol. Cancer Ther.* **19**, 1423–1435 (2020).
- 644 35. Li, J. *et al.* Epigenetic and transcriptional control of the epidermal growth factor  
645 receptor (EGFR) regulates the tumor immune microenvironment in pancreatic cancer.  
646 *Cancer Discov.* **18**, CD-20-0519 (2020).
- 647 36. Yuan, S. *et al.* Global regulation of the histone mark H3K36me2 underlies epithelial  
648 plasticity and metastatic progression. *Cancer Discov.* CD-19-1299 (2020).  
649 doi:10.1158/2159-8290.CD-19-1299
- 650 37. Kearney, C. J. *et al.* Tumor immune evasion arises through loss of TNF sensitivity.  
651 *Sci. Immunol.* **3**, eaar3451 (2018).
- 652 38. Noman, M. Z. *et al.* *Inhibition of Vps34 reprograms cold into hot inflamed tumors and*  
653 *improves anti-PD-1/PD-L1 immunotherapy.* (2020).
- 654 39. Boj, S. F. *et al.* Organoid models of human and mouse ductal pancreatic cancer. *Cell*  
655 **160**, 324–338 (2015).
- 656

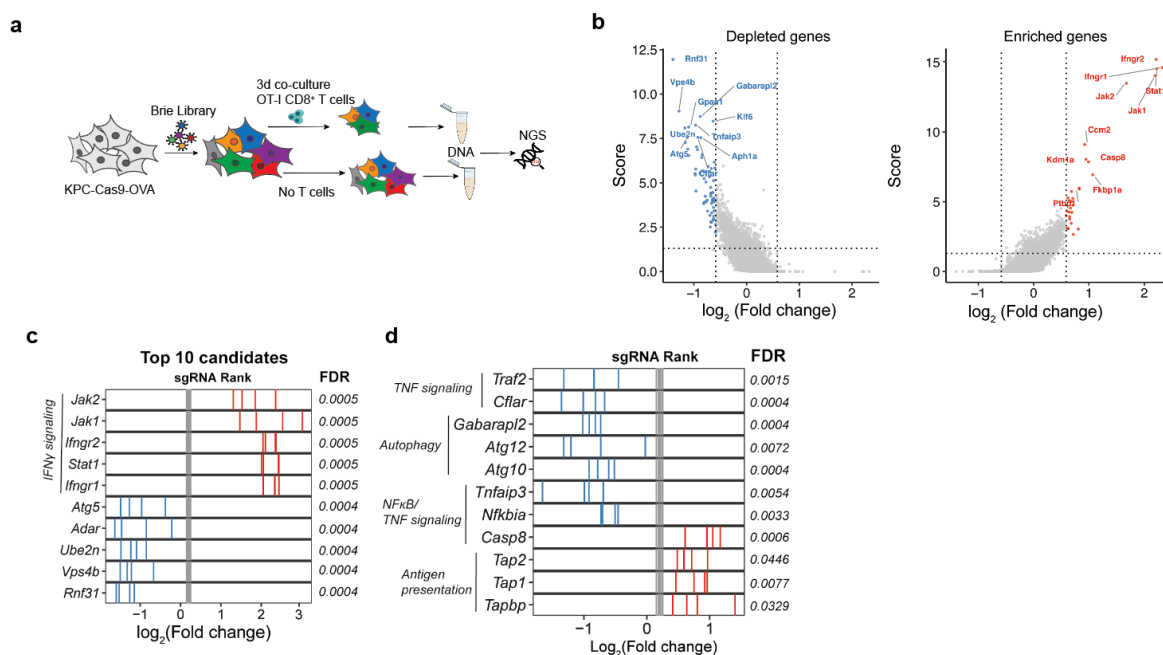

657

658 **Figure 1: Genome-wide CRISPR screen in PDA cells reveals immune evasion**

659 **mechanisms in vitro.** (a) Schematic of genome-wide in vitro CRISPR screen. (b) Volcano

660 plot of top ten depleted (blue) and enriched (red) genes. Screening analysis was performed with

661 MaGeCK RRA. (c) sgRANK of the top (red) and bottom (blue) five depleted genes is

662 represented. Grey bars represent non-targeting sgRNAs. (d) sgRANK of the enriched (red) and

663 depleted (blue) genes of different immune evasion pathways. Grey bars represent non-targeting

664 sgRNAs.

665

666

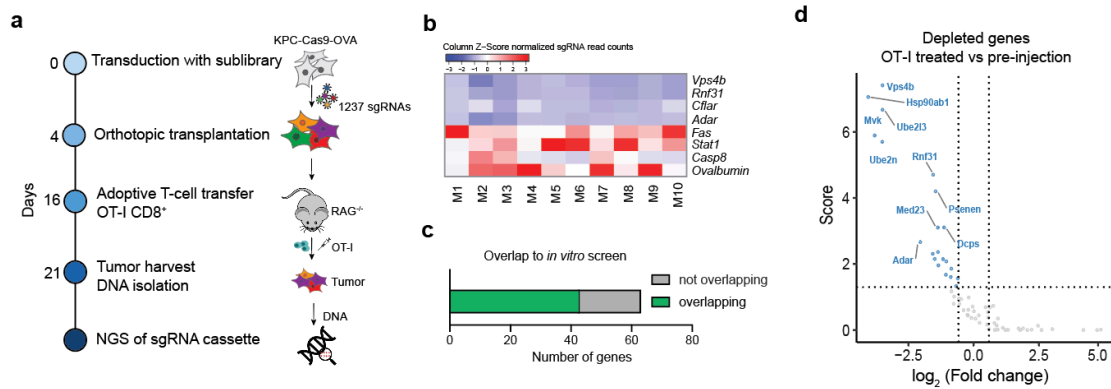

667

668 **Figure 2: A targeted CRISPR library screen validates candidates in vivo.** (a) Schematic

669 of the secondary CRISPR screen *in vivo*. (b) Heatmap of normalized read counts of sgRNAs

670 across ten individual mice (M1 - M10). (c) Bar diagram of sublibrary genes in comparison to

671 their predicted phenotype (from *in vitro* screen). (d) Volcano plot of depleted (blue dots) genes

672 of the sublibrary *in vivo* screen when comparing the pool of preinjected KPC cells to OT-I

673 CD8<sup>+</sup> T cell treated tumors.

674



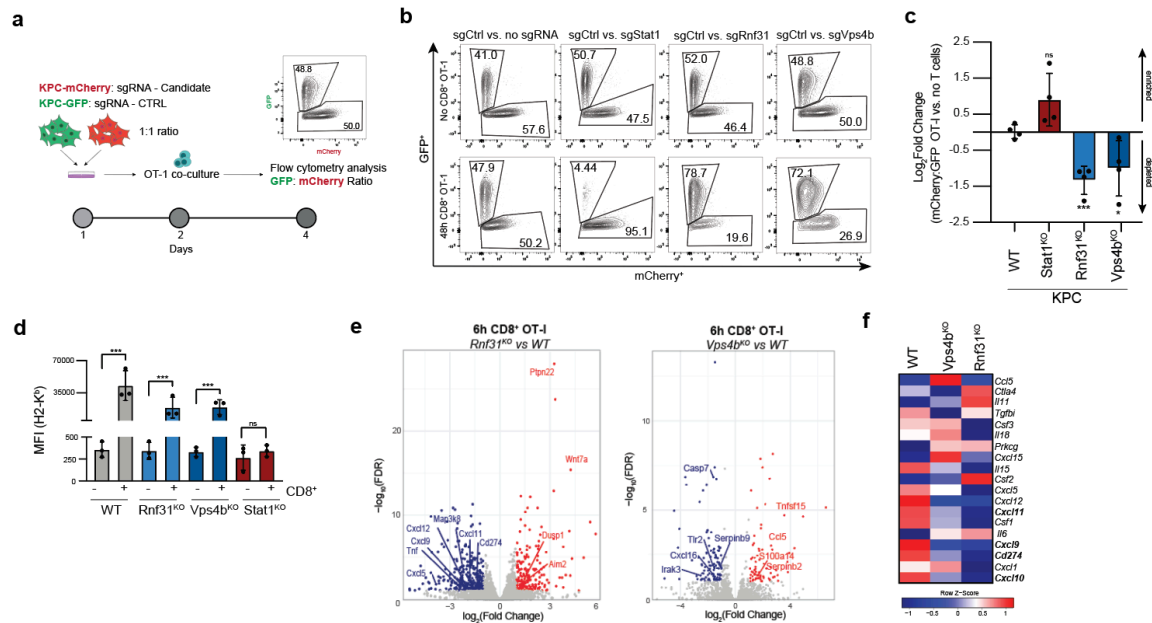

675

676 **Figure 3: Arrayed validation of selected screening hits *in vitro*.** (a) Schematic of *in vitro*

677 competition assay. (b) Representative flow cytometry plots (GFP vs. mCherry) of the arrayed

678 hit validation with and without T cell co-culture. (c) Quantification of (b). Log<sub>2</sub> Fold change

679 of the mCherry:GFP ratio OT-I treated compared to the matched untreated condition. (d) Mean

680 fluorescence intensity (MFI) of Pan-H2-K<sup>b</sup>. (e) Volcano plots of differentially expressed (DE)

681 genes in *Rnf31*<sup>KO</sup> and *Vps4b*<sup>KO</sup> cells after 6h of OT-I T cell exposure compared to equivalently

682 treated KPC<sup>WT</sup> cells. Highlighted genes are putatively involved in anti-tumor immunity. DE

683 genes in red/blue: |Log<sub>2</sub>FC| > 1, FDR < 0.1. (f) Heatmap of normalized counts per million

684 (CPM) of selected immune modulatory factors after OT-I T cell exposure across different

685 genotypes. Significance in (c) was determined with an unpaired two-tailed t test. Significance

686 in (d) was determined with one-way ANOVA analysis. \*p < 0.05, \*\*p < 0.01, \*\*\*p < 0.001;

687 ns, non-significant, p > 0.05. Values represent mean ± SD, data are derived from at least three

688 independent experiments.

689

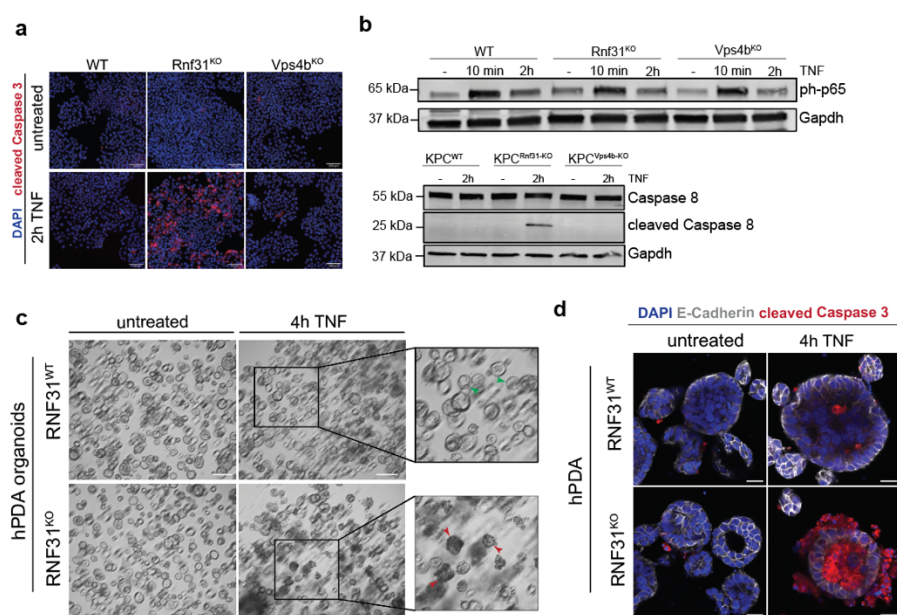

690

691 **Figure 4: *Rnf31*<sup>KO</sup> sensitizes PDA to TNF-triggered apoptosis.** (a) Immunofluorescence

692 staining of KPC candidate lines after 2h of 100 ng/ml TNF. Cleaved caspase 3 (red) and DAPI

693 (blue). Scale bar represents 100  $\mu$ m. (b) Western Blot analysis of KPC cell lines after TNF

694 treatment (100 ng/ml) for active NF $\kappa$ B signaling (phospho-p65; upper panel) and cleaved

695 caspase 8/caspase 8 (bottom panel). Gapdh was included as loading control. (c) Brightfield

696 images of human PDA organoids in the presence of 100 ng/ml TNF for 4h. Boxes highlight

697 viable (green arrows) and dying organoids (red arrows). Scale bar represents 200  $\mu$ m. (d)

698 Whole mount staining of human PDA organoids after 4h TNF (100 ng/ml) treatment with

699 cleaved caspase 3 (red), E-cadherin (white) and DAPI (blue). Scale bar represents 20  $\mu$ m.

700

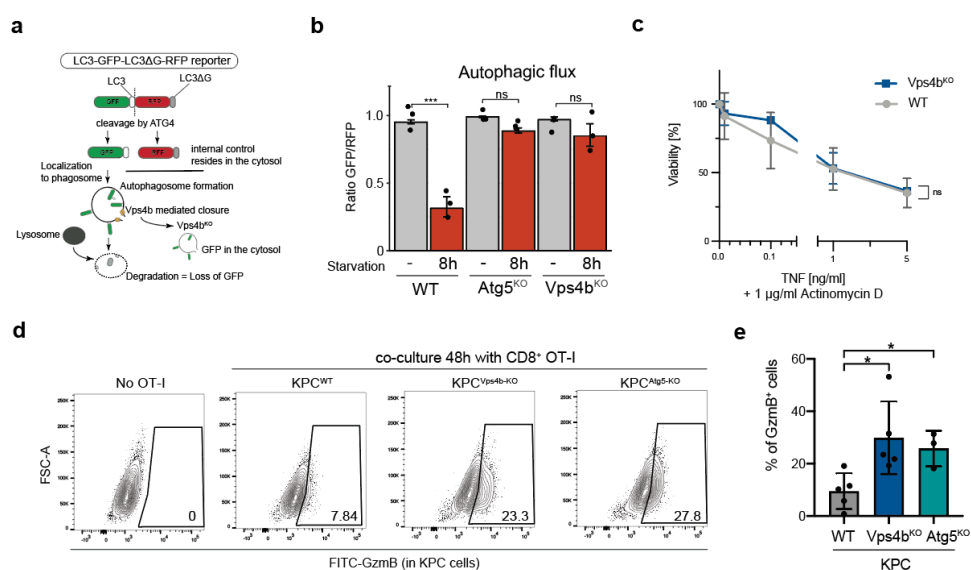

701

702 **Figure 5: Disruption of Vps4b leads to impaired autophagy and granzyme B**

703 **accumulation in tumor cells. (a)** Schematic of autophagic flux reporter based on the LC3-

704 GFP-LC3ΔG-RFP probe adapted from Kaizuka *et al.*<sup>31</sup>. **(b)** Quantification of autophagic flux

705 by flow cytometry in different KPC lines under normal and starvation conditions (8h in PBS +

706 2% FBS). Bars represent the ratio of GFP to RFP expressing cells. **(c)** Assessment of TNF

707 sensitivity threshold in WT and Vps4b<sup>KO</sup> KPC cells in the presence of 1 μg/ml actinomycin D.

708 Crystal violet staining was used for quantification of viable cells. Represented data is relative

709 to untreated control cells. **(d)** Flow cytometric analysis of intracellular granzyme B in KPC

710 cells. Cells were gated on FSC/SCC – viability - CD8<sup>-</sup> negative. **(e)** Quantification of granzyme

711 B positive cancer cells and T cells based on **(d)**. Significance in **(c)** was determined with an

712 unpaired two-tailed t test. Significance in **(b)** was determined with one-way ANOVA.

713 Significance in **(e)** was determined with an unpaired, two-tailed t-test. \*p < 0.05, \*\*p < 0.01,

714 \*\*\*p < 0.001; ns, non-significant, p > 0.05. Values represent mean ± SD, data are derived

715 from at least three independent experiments.

716

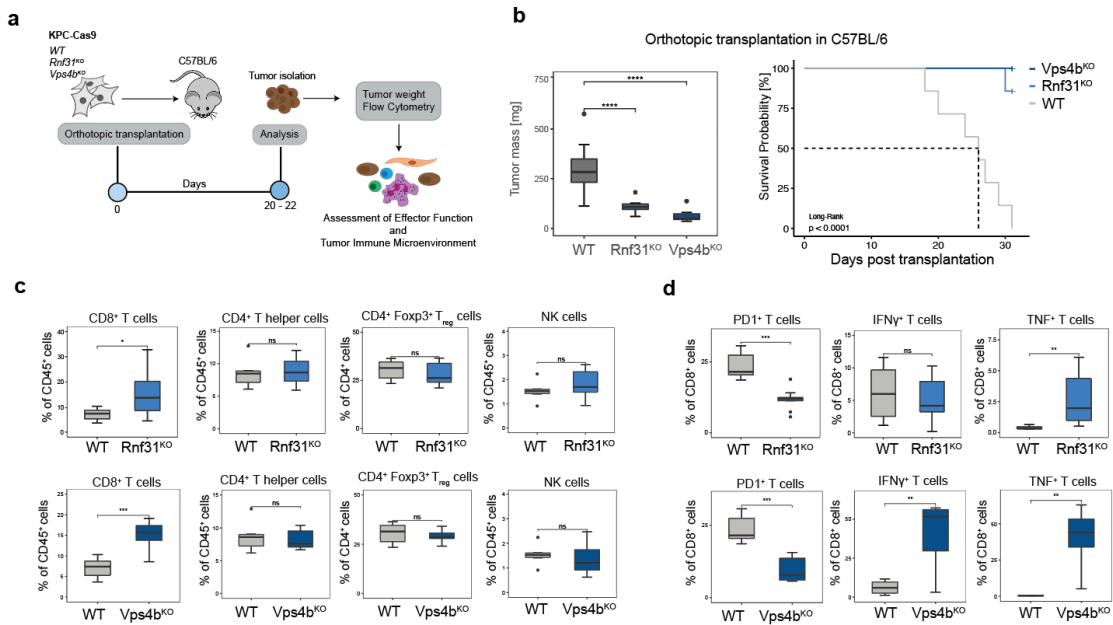

717

718 **Figure 6: *Rnf31*<sup>KO</sup> and *Vps4b*<sup>KO</sup> enhances CD8<sup>+</sup> T cell function *in vivo*.** (a) Schematic of in  
 719 vivo experimental set up. (b) Tumor weight and survival after orthotopic transplantation into  
 720 C5BL/6 mice. (c) Flow cytometry analysis of immune cell population within tumors. (d) Flow  
 721 cytometry analysis of effector function of CD8<sup>+</sup> T cells within tumors. Significance in (b, panel  
 722 1), (c) and (d) was determined with an unpaired two-tailed t test. \* $p < 0.05$ , \*\* $p < 0.01$ , \*\*\* $p$   
 723  $< 0.001$ ; ns, non-significant,  $p > 0.05$ . The middle line in the boxplots shows the median, the  
 724 lower and upper hinges represent the first and third quartiles, and whiskers represent  $\pm 1.5 \times$  the  
 725 interquartile range.
